# Supplementary material for: Malus Antioxidant Metabolism Following Bacterial–Fungal Inoculation in Organic Farming: From Root to Fruit
Source: MDPI journal article supplement (doi:10.3390/app11209466), 2021-10-12
Supplement: s1 [file s1]

**Table S1.** Total antioxidant capacity measured in ABTS, DPPH, FRAP tests (mmol TE kg<sup>-1</sup> FW; TE-trolox equivalents): in roots, leaves and fruit: year, cultivar and bacterial-fungal inoculation effects

| Treatment                     | Growing season    |             |             |             | Growing season  |              |             |             |
|-------------------------------|-------------------|-------------|-------------|-------------|-----------------|--------------|-------------|-------------|
|                               | <b>2012</b>       |             |             |             | <b>2013</b>     |              |             |             |
|                               | Cultivar          |             |             |             | Cultivar        |              |             |             |
|                               | Topaz             | Chopin      | Odra        |             | Topaz           | Chopin       | Odra        |             |
|                               | <b>ROOTS</b>      |             |             |             |                 |              |             |             |
|                               | Av <sup>T</sup>   |             |             |             | Av <sup>T</sup> |              |             |             |
|                               | ABTS              |             |             |             |                 |              |             |             |
| N-INO <sup>a</sup>            | 103±5             | 105±3       | 116±9       | 108         | 173±15          | 187±13       | 198±7       | 186         |
| INO <sup>b</sup>              | 92±9              | 109±9       | 101±9       | 101         | 192±6           | 196±11       | 190±12      | 192         |
| <b>INO effect<sup>c</sup></b> | <b>0.89</b>       | <b>1.04</b> | <b>0.87</b> | <b>0.94</b> | <b>1.11</b>     | <b>1.05</b>  | <b>0.96</b> | <b>1.03</b> |
|                               | DPPH              |             |             |             |                 |              |             |             |
| N-INO                         | 29.9±4.0          | 34.4±1.8    | 34.6±1.4    | 33.0        | 37.3±1.6        | 41.7±9.0     | 50.3±4.8    | 43.1        |
| INO                           | 28.3±3.9          | 33.2±2.4    | 32.2±2.6    | 31.2        | 40.0±6.4        | 46.8±5.4     | 43.6±7.7    | 43.4        |
| <b>INO effect</b>             | <b>0.95</b>       | <b>0.97</b> | <b>0.93</b> | <b>0.95</b> | <b>1.07</b>     | <b>1.12±</b> | <b>0.87</b> | <b>1.01</b> |
|                               | FRAP              |             |             |             |                 |              |             |             |
| N-INO                         | 41.1±4.1          | 46.8±5.7    | 55.6±5.2    | 47.8        | 43.6±2.7        | 57.5±4.1     | 54.7±8.9    | 51.9        |
| INO                           | 42.4±7.0          | 48.8±4.8    | 49.0±7.1    | 46.7        | 49.1±5.7        | 44.0±14      | 47.2±7.2    | 46.8        |
| <b>INO effect</b>             | <b>1.03</b>       | <b>1.04</b> | <b>0.88</b> | <b>0.98</b> | <b>1.13</b>     | <b>0.77</b>  | <b>0.86</b> | <b>0.90</b> |
|                               | <b>LEAVES</b>     |             |             |             |                 |              |             |             |
|                               | Av <sup>T</sup>   |             |             |             | Av <sup>T</sup> |              |             |             |
|                               | ABTS              |             |             |             |                 |              |             |             |
| N-INO                         | 160±7             | 149±4       | 156±11      | 155         | 226±82          | 161±10       | 169±8       | 185         |
| INO                           | 161±9             | 146±6       | 153±6       | 153         | 158±15          | 169±8        | 168±8       | 165         |
| <b>INO effect</b>             | <b>1.01</b>       | <b>0.98</b> | <b>0.98</b> | <b>0.99</b> | <b>0.70</b>     | <b>1.05</b>  | <b>0.9</b>  | <b>0.89</b> |
|                               | DPPH              |             |             |             |                 |              |             |             |
| N-INO                         | 152±24            | 149±20      | 146±25      | 149         | 231±63          | 137±12       | 176±22      | 182         |
| INO                           | 142±11            | 108±10      | 149±7       | 133         | 162±23          | 192±30       | 179±7       | 178         |
| <b>INO effect</b>             | <b>0.93</b>       | <b>0.72</b> | <b>1.02</b> | <b>0.89</b> | <b>0.70</b>     | <b>1.40</b>  | <b>1.0</b>  | <b>0.98</b> |
|                               | FRAP              |             |             |             |                 |              |             |             |
| N-INO                         | 132±6             | 125±11      | 117±5       | 125         | 161±19          | 121±23       | 128±21      | 137         |
| INO                           | 137±14            | 97±9        | 117±7       | 117         | 151±12          | 104±16       | 130±15      | 128         |
| <b>INO effect</b>             | <b>1.04</b>       | <b>0.78</b> | <b>1.00</b> | <b>0.94</b> | <b>0.94</b>     | <b>0.86</b>  | <b>1.02</b> | <b>0.94</b> |
|                               | <b>APPLE PEEL</b> |             |             |             |                 |              |             |             |
|                               | Av <sup>T</sup>   |             |             |             | Av <sup>T</sup> |              |             |             |
|                               | ABTS              |             |             |             |                 |              |             |             |
| N-INO                         | 46.4±10           | 45.5±6.2    | 56.9±4.0    | 49.6        | 58.9±5.9        | 67.6±2.4     | 84.2±13.7   | 70.2        |
| INO                           | 46.9±3.6          | 48.9±5.2    | 64.2±13     | 53.3        | 62.6±6.6        | 59.6±11      | 75.9±3.6    | 66.0        |
| <b>INO effect</b>             | <b>1.01</b>       | <b>1.07</b> | <b>1.13</b> | <b>1.07</b> | <b>1.06</b>     | <b>0.88</b>  | <b>0.90</b> | <b>0.94</b> |
|                               | DPPH              |             |             |             |                 |              |             |             |

|                   |             |             |             |             |             |             |             |             |
|-------------------|-------------|-------------|-------------|-------------|-------------|-------------|-------------|-------------|
| N-INO             | 18.8±3.7    | 17.0±2.1    | 18.7±3.3    | 18.2        | 25.0±0.9    | 26.2±0.9    | 26.7±1.8    | 26.0        |
| INO               | 16.5±1.3    | 19.7±2.3    | 20.5±2.5    | 18.9        | 26.1±0.7    | 25.6±1.7    | 25.7±2.1    | 25.8        |
| <b>INO effect</b> | <b>0.88</b> | <b>1.16</b> | <b>1.10</b> | <b>1.04</b> | <b>1.04</b> | <b>0.98</b> | <b>0.96</b> | <b>0.99</b> |
| FRAP              |             |             |             |             |             |             |             |             |
| N-INO             | 36.8±8.4    | 25.3±4.9    | 35.4±3.7    | 32.5        | 36.3±3.4    | 36.2±3.3    | 49.9±8.7    | 40.8        |
| INO               | 31.8±2.4    | 27.4±3.5    | 35.1±4.2    | 31.4        | 37.4±4.2    | 43.4±9.3    | 53.6±5.9    | 44.8        |
| <b>INO effect</b> | <b>0.86</b> | <b>1.08</b> | <b>0.99</b> | <b>0.97</b> | <b>1.03</b> | <b>1.20</b> | <b>1.07</b> | <b>1.10</b> |

<sup>a</sup> non-inoculated plants; <sup>b</sup> inoculated plants; <sup>c</sup> inoculation effect: index obtained by dividing the 'INO' value by the 'N-INO' value of the tested cultivar. Mean separation for treatment (N-INO vs INO plants) by Tukey test (p<0.05); Av<sup>T</sup> – average for treatment; presented values are the means of four replicates ±SD; FW – fresh weight; ABTS: 2,20-azino-bis(3-ethylbenzothiazoline-6-sulphonic acid); DPPH: 2,2-diphenyl-1-picrylhydrazyl; FRAP: ferric reducing antioxidant power.
